# Supplementary material for: Facile iron(iii)-mediated ATRP of MMA with phosphorus-containing ligands in the absence of any additional initiators
Source: Royal Society of Chemistry journal article supplement (doi:10.1039/c5ra10317g), 2015-01-01
Supplement: c5ra10317g1.pdf [file c5ra10317g1.pdf]

## Supporting Information

### Facile Iron(III)-Mediated ATRP of MMA with Phosphorus-Containing Ligands in the Absence of Any Additional Initiators

Liangjiu Bai<sup>\*a</sup>, Wenxiang Wang<sup>a</sup>, Hou Chen<sup>a</sup>, Lifan Zhang<sup>b</sup>, Zhenping Cheng<sup>b\*</sup> and Xiulin Zhu<sup>b</sup>

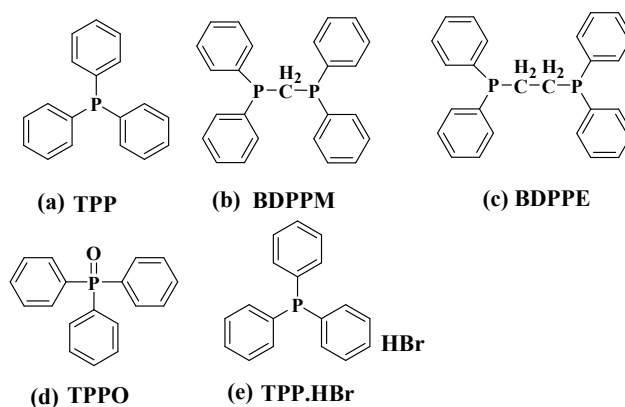

**Scheme S1.** The structures of Some Phosphorus ligands used in this work.

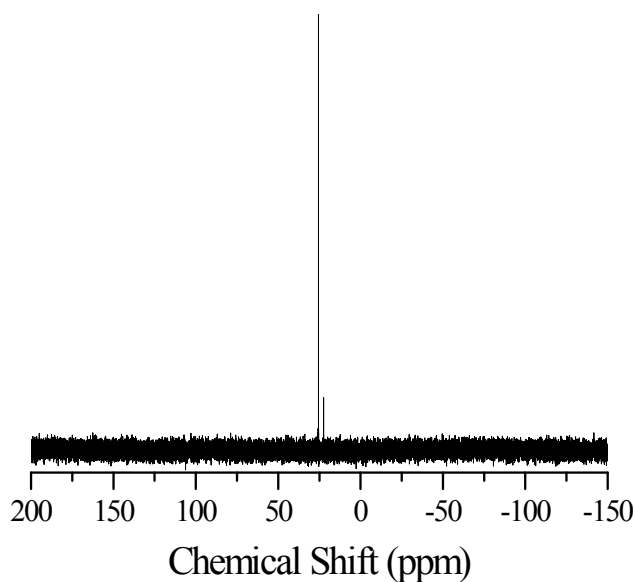

**Figure S1.** <sup>31</sup>P NMR spectrum of PMMA obtained with [MMA]<sub>0</sub>/[TPP]<sub>0</sub> = 100/2 (entry 2 in Table S1) using CDCl<sub>3</sub> as the solvent and tetramethylsilane (TMS) as the internal standard. Polymerization conditions: [MMA]<sub>0</sub>/[TPP]<sub>0</sub> = 100/2, bulk, temperature = 90 °C, time = 70 h.

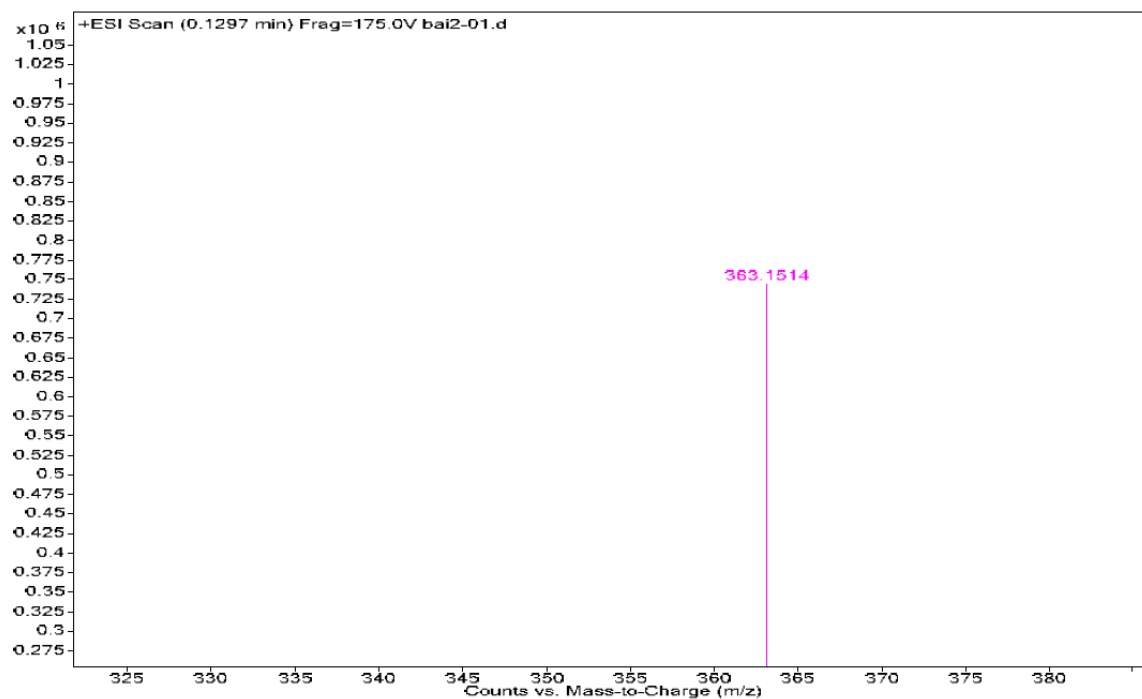

**Figure S2.** LC-MS spectrum of MMA/TPP = 10/1 (formula (M):  $C_{23}H_{23}O_2P$ ) with MeCN as solvent.
